# Supplementary material for: Overexpression of long non-coding RNA AP001505.9 inhibits human hyaline chondrocyte dedifferentiation
Source: publisher site journal article supplement (doi:10.18632/aging.202833), 2021-04-04
Supplement: Supplementary file [file aging-v13i8-202833-supplementary-material-SD1.pdf]

## SUPPLEMENTARY TABLES

**Supplementary Table 1. Top 20 differentially expressed lncRNAs in human chondrocyte dedifferentiation *in vitro*.**

| Seqname         | Genesymbol        | Fold change | Regulation | P value     |
|-----------------|-------------------|-------------|------------|-------------|
| ENST00000610087 | RP11-53B2.6       | 13.61615    | down       | 0.008840036 |
| NR_024089       | LINC00162         | 9.0286718   | down       | 0.000474045 |
| T117110         | G027615           | 8.539106    | down       | 0.002149133 |
| ENST00000605537 | RP4-555D20.3      | 8.1710518   | down       | 0.001764169 |
| NR_026860       | LINC00473         | 7.0314198   | down       | 0.007761257 |
| ENST00000525376 | AF186192.1        | 6.6547277   | down       | 0.000534007 |
| T166066         | G038554           | 6.0541931   | down       | 0.042381964 |
| NR_046283       | NEBL-AS1          | 5.1958752   | down       | 0.006541277 |
| NR_027082       | SFTA1P            | 5.0757797   | down       | 0.015806733 |
| ENST00000554032 | RP6-65G23.3       | 4.6948336   | down       | 0.047019677 |
| T009872         | G002089           | 4.6358255   | down       | 0.004060744 |
| NR_033997       | RNF144A-AS1       | 4.4444077   | down       | 0.013727556 |
| ENST00000569966 | AP001505.9        | 4.3928127   | down       | 0.009667888 |
| ENST00000608286 | LL22NC03-N14H11.1 | 4.0253927   | down       | 0.01127986  |
| T117111         | G027616           | 4.0109597   | down       | 0.002496261 |
| NR_036503       | PRKCQ-AS1         | 3.969014    | down       | 0.00934634  |
| T268788         | G062245           | 3.7967111   | down       | 0.011046808 |
| T327661         | G076785           | 3.6682149   | down       | 0.018013603 |
| ENST00000603720 | RP11-297J22.1     | 3.6442772   | down       | 0.029502834 |
| TCONS_00006002  | XLOC_002629       | 3.6380732   | down       | 0.005400053 |
| NR_038848       | LINC01021         | 13.268177   | up         | 0.002749195 |
| uc001szi.3      | AK022997          | 5.5453205   | up         | 0.023157849 |
| NR_120384       | CLYBL-AS1         | 5.0195295   | up         | 0.030403683 |
| T214806         | G049673           | 4.8163804   | up         | 0.040120208 |
| T191664         | G044136           | 4.6401846   | up         | 0.019490651 |
| ENST00000412485 | GS1-600G8.5       | 3.8646113   | up         | 0.013736066 |
| NR_036540       | LINC00622         | 3.2450684   | up         | 0.00102767  |
| ENST00000609674 | RP11-563K23.1     | 3.1289083   | up         | 0.043366377 |
| uc.185-         | uc.185            | 3.1146988   | up         | 0.017589456 |
| ENST00000451982 | LINC00969         | 2.9062816   | up         | 0.043586644 |
| T328268         | G076957           | 2.8993137   | up         | 0.020211392 |
| ENST00000573950 | TAPT1-AS1         | 2.7537015   | up         | 0.001847727 |
| ENST00000608605 | RP11-804H8.6      | 2.7520865   | up         | 0.039475391 |
| uc003ifn.3      | AK090904          | 2.7447524   | up         | 0.004243131 |
| T132722         | G031137           | 2.7103456   | up         | 0.032493573 |
| ENST00000423781 | AC004870.4        | 2.6490488   | up         | 0.013810326 |
| uc.185+         | uc.185            | 2.5668814   | up         | 0.041669705 |
| NR_024006       | LINC00950         | 2.5124995   | up         | 0.015626844 |
| NR_120623       | TCERG1L-AS1       | 2.4902614   | up         | 0.016778347 |
| NR_131012       | NEAT1             | 2.4842201   | up         | 0.007916494 |

**Supplementary Table 2. Significant differentially expressed mRNAs in human chondrocyte dedifferentiation *in vitro*.**

| <b>Seqname</b>  | <b>Genesymbol</b> | <b>Fold change</b> | <b>Regulation</b> | <b>P value</b> |
|-----------------|-------------------|--------------------|-------------------|----------------|
| NM_022073       | EGLN3             | 32.531482          | down              | 0.003047488    |
| NM_031950       | FGFBP2            | 28.505518          | down              | 0.007176272    |
| NM_002422       | MMP3              | 25.838385          | down              | 0.007266615    |
| NM_001851       | COL9A1            | 25.715546          | down              | 0.025907389    |
| NM_006408       | AGR2              | 14.594614          | down              | 0.000418139    |
| NM_004867       | ITM2A             | 14.22944           | down              | 0.000910927    |
| NM_002425       | MMP10             | 13.706152          | down              | 0.011459855    |
| NM_016445       | PLEK2             | 13.044514          | down              | 0.001537248    |
| NM_173662       | RNF175            | 12.99444           | down              | 0.004850343    |
| NM_001242668    | C8orf87           | 11.733266          | down              | 0.003816175    |
| NM_152770       | C4orf22           | 8.5786754          | up                | 0.003444654    |
| NM_003619       | PRSS12            | 6.766859           | up                | 0.029568537    |
| NM_174858       | AK5               | 4.5321298          | up                | 0.017562526    |
| NM_004666       | VNN1              | 3.6649314          | up                | 0.000810995    |
| ENST00000374375 | GDF5OS            | 3.6237528          | up                | 0.009969044    |
| NM_001148       | ANK2              | 3.2715659          | up                | 0.000513397    |
| NM_144488       | RGS3              | 3.0256487          | up                | 0.01713328     |
| NM_002655       | PLAG1             | 3.0189914          | up                | 0.039626551    |
| NM_015713       | RRM2B             | 2.9571532          | up                | 0.002338046    |
| NM_182597       | LSMEM1            | 2.9430627          | up                | 7.06605E-06    |

**Supplementary Table 3. Primers used in mRNA and lncRNA real-time qPCR.**

| Gene name   | Sequences of primers                                          |
|-------------|---------------------------------------------------------------|
| COL1A1      | F:5'GTTGCTGCTTGCAGTAACCTT3'<br>R:5'AGGGCCAAGTCCAACCTT3'       |
| COL2A1      | F:5'TGGACGATCACGAAACC3'<br>R:5'GCTGCGGATGCTCTCAATCT3'         |
| SOX-9       | F:5'AGCGAACGCACATCAAGAC3'<br>R:5'CTGTAGGCGATCTGTTGGGG3'       |
| AK5         | F:5'GCAGAGCAAATTATGAGC3'<br>R:5'TAGCTGGGAAGCAAACAGT3'         |
| VNN1        | F:5'CCGCTAGCACCATGACTACTC3'<br>R:5'GCTCGAGCTACCAACTTAATGA3'   |
| GDF5        | F:5'CGATAAGACCGTGTATGAGT3'<br>R:5'CTCGCAGTGGAAAGCCTCGT3'      |
| EGLN3       | F:5'CATCAGCTTCCTCCTGTC3'<br>R:5'CCACCATTGCCTTAGACC3'          |
| FGFBP2      | F:5'TGGGAACATTGTTGGAAACC3'<br>R:5'GGTTGTCTGTCAGGGAGAGG3'      |
| MMP3        | F:5'AGTCTTCCAATCCTACTGTTGCT3'<br>R:5'TCCCCGTCACCTCCAATCC3'    |
| COL9A1      | F:5'TCGATGGCTTTGCTGTGCTGGG3'<br>R:5'TGGGTTCGAGGGGGTCACAAT3'   |
| CLYBL-AS1   | F:5'ACCAAGAAGCAGGATAGTTAGG3'<br>R:5'TGCCAGGCTCATTGTCATA3'     |
| LINC01021   | F:5'ACTGACCCTTCAATGTGCCC3'<br>R:5'CATTCTCAAGCCCCGTGTT3'       |
| AP001505.9  | F:5'GCCTCTTGTTTTCTTCCC3'<br>R:5'TGCTTCGTGGTGAGACTCCT3'        |
| RP6-65G23.3 | F:5'CTCCCCTTTATGAGGACTGC3'<br>R:5'CTCAGCATGGTTGTAAGCAGTA3'    |
| G012825     | F:5'CTTCTACTCCAGGTAAACCC3'<br>R:5'TCTCCATCAGCAGTCCAAAC3'      |
| G062245     | F:5'CCCAGTAGGAGGATAGTCAAGG3'<br>R:5'TGTGGTGATGGGACTTCGTG3'    |
| AC020594.5  | F:5'CGCCCACTACAGGAAATGAAG3'<br>R:5'CCACGGGACAAATACTACTCAGA 3' |
| LINC00473   | F:5'AGCCAAAAGGGTTTAGAGTCAG3'<br>R:5'GAGCAGGTAGGGAAATGATGTT3'  |
| LINC00162   | F:5'CGCTGAACTGCCTGGACTTT3'<br>R:5'TGTGCGGTCTCCTCTTGGGT3'      |
| GS1-600G8.5 | F:5'CGGGGAGTCTTGAGAATGGG3'<br>R:5'TAATCAGGCCGGAGTTGCA3'       |
| GAPDH       | F:5'CGCTCTCTGCTCCTCCTGTT3'<br>R:5'CCATGGTGTCTGAGCGATGT3'      |
| β-Actin     | F:5'GTGGCCGAGGACTTTGATTG3'<br>R:5'CCTGTAACAACGCATCTCATATT3'   |

**Supplementary Table 4. Primers used in microRNA real-time qPCR.**

| <b>microRNA</b> | <b>Source</b> | <b>Identifier</b> |
|-----------------|---------------|-------------------|
| hsa-miR-518a-5p | GeneCopoeia   | HmiRQP0579        |
| hsa-miR-495-3p  | GeneCopoeia   | HmiRQP0537        |
| hsa-miR-5668    | GeneCopoeia   | HmiRQP2716        |
| snRNA U6        | GeneCopoeia   | HmiRQP9001        |
